# Supplementary material for: Intertwined Evolutionary Histories of Marine Synechococcus and Prochlorococcus marinus
Source: PubMed Central journal article supplement — Genome Biol Evol. 2009 Sep 2;1:325–39. doi: 10.1093/gbe/evp032 (PMC2817427; doi:10.1093/gbe/evp032), 2009-09-02
Supplement: evp032_2.pdf [file evp032_2.pdf]

**Supplementary Table 3.** Inferred positions of root (see also Figure 3).

| Bipartition at which the root is inferred*                                                                                                                                | Number of supporting gene families |
|---------------------------------------------------------------------------------------------------------------------------------------------------------------------------|------------------------------------|
| RCC307   AS9601 CCMP1375 CC9605 CC9902 WH8102 MIT9211 MIT9215 WH7803 MIT9301 CCMP1986 MIT9313 MIT9303 MIT9312 MIT9515 NATL1A NATL2A CC9311                                | 433                                |
| CC9605 CC9902 WH8102 RCC307 WH7803 MIT9313 MIT9303 CC9311   AS9601 CCMP1375 MIT9211 MIT9215 MIT9301 CCMP1986 MIT9312 MIT9515 NATL1A NATL2A                                | 177                                |
| AS9601 MIT9215 MIT9301 CCMP1986 MIT9312 MIT9515   CCMP1375 CC9605 CC9902 WH8102 MIT9211 RCC307 WH7803 MIT9313 MIT9303 NATL1A NATL2A CC9311                                | 107                                |
| CC9605 CC9902 WH8102 RCC307 WH7803 CC9311   AS9601 CCMP1375 MIT9211 MIT9215 MIT9301 CCMP1986 MIT9313 MIT9303 MIT9312 MIT9515 NATL1A NATL2A                                | 37                                 |
| AS9601 MIT9215 MIT9301 CCMP1986 MIT9312 MIT9515 NATL1A NATL2A   CCMP1375 CC9605 CC9902 WH8102 MIT9211 RCC307 WH7803 MIT9313 MIT9303 CC9311                                | 15                                 |
| AS9601 CCMP1375 MIT9211 MIT9215 MIT9301 CCMP1986 MIT9312 MIT9515   CC9605 CC9902 WH8102 RCC307 WH7803 MIT9313 MIT9303 NATL1A NATL2A CC9311                                | 7                                  |
| CC9605 CC9902 WH8102 WH7803 MIT9313 MIT9303 CC9311   AS9601 CCMP1375 MIT9211 MIT9215 RCC307 MIT9301 CCMP1986 MIT9312 MIT9515 NATL1A NATL2A                                | 6                                  |
| CCMP1375 CC9605 CC9902 WH8102 MIT9211 WH7803 MIT9313 MIT9303 NATL1A NATL2A CC9311   AS9601 MIT9215 RCC307 MIT9301 CCMP1986 MIT9312 MIT9515                                | 5                                  |
| CC9311   AS9601 CCMP1375 CC9605 CC9902 WH8102 MIT9211 MIT9215 RCC307 WH7803 MIT9301 CCMP1986 MIT9313 MIT9303 MIT9312 MIT9515 NATL1A NATL2A                                | 4                                  |
| MIT9313 MIT9303   AS9601 CCMP1375 CC9605 CC9902 WH8102 MIT9211 MIT9215 RCC307 WH7803 MIT9301 CCMP1986 MIT9312 MIT9515 NATL1A NATL2A CC9311                                | 4                                  |
| WH7803   AS9601 CCMP1375 CC9605 CC9902 WH8102 MIT9211 MIT9215 RCC307 MIT9301 CCMP1986 MIT9313 MIT9303 MIT9312 MIT9515 NATL1A NATL2A CC9311                                | 4                                  |
| CC9605 CC9902 WH8102 WH7803 CC9311   AS9601 CCMP1375 MIT9211 MIT9215 RCC307 MIT9301 CCMP1986 MIT9313 MIT9303 MIT9312 MIT9515 NATL1A NATL2A                                | 4                                  |
| CC9605 CC9902 WH8102 RCC307   AS9601 CCMP1375 MIT9211 MIT9215 RCC307 MIT9301 CCMP1986 MIT9313 MIT9303 MIT9312 MIT9515 NATL1A NATL2A CC9311                                | 3                                  |
| CC9605 CC9902 WH8102 MIT9211 RCC307 WH7803 MIT9313 MIT9303 CC9311   AS9601 CCMP1375 MIT9211 MIT9215 RCC307 MIT9301 CCMP1986 MIT9313 MIT9303 MIT9312 MIT9515 NATL1A NATL2A | 3                                  |
| CC9605 CC9902 WH8102   AS9601 CCMP1375 MIT9211 MIT9215 RCC307 WH7803 MIT9301 CCMP1986 MIT9313 MIT9303 MIT9312 MIT9515 NATL1A NATL2A CC9311                                | 3                                  |
| MIT9211   AS9601 CCMP1375 CC9605 CC9902 WH8102 MIT9215 RCC307 WH7803 MIT9301 CCMP1986 MIT9313 MIT9303 MIT9312 MIT9515 NATL1A NATL2A CC9311                                | 3                                  |
| AS9601 CCMP1375 MIT9211 MIT9215 WH7803 MIT9301 CCMP1986 MIT9312 MIT9515 NATL1A NATL2A   CC9605 CC9902 WH8102 RCC307 MIT9313 MIT9303 CC9311                                | 2                                  |
| RCC307 MIT9313 MIT9303   AS9601 CCMP1375 CC9605 CC9902 WH8102 MIT9211 MIT9215 WH7803 MIT9301 CCMP1986 MIT9312 MIT9515 NATL1A NATL2A CC9311                                | 2                                  |
| MIT9515   AS9601 CCMP1375 CC9605 CC9902 WH8102 MIT9211 MIT9215 RCC307 WH7803 MIT9301 CCMP1986 MIT9313 MIT9303 MIT9312 NATL1A NATL2A CC9311                                | 1                                  |
| CC9605 RCC307 CC9311   AS9601 CCMP1375 CC9902 WH8102 MIT9211 MIT9215 WH7803 MIT9301 CCMP1986 MIT9313 MIT9303 MIT9312 MIT9515 NATL1A NATL2A                                | 1                                  |
| CC9605 WH8102 RCC307 WH7803 MIT9313 MIT9303 CC9311   AS9601 CCMP1375 CC9902 MIT9211 MIT9215 MIT9301 CCMP1986 MIT9312 MIT9515 NATL1A NATL2A                                | 1                                  |
| CC9605 WH8102 RCC307   AS9601 CCMP1375 CC9902 MIT9211 MIT9215 WH7803 MIT9301 CCMP1986 MIT9313 MIT9303 MIT9312 MIT9515 NATL1A NATL2A CC9311                                | 1                                  |
| CCMP1375 CC9605 CC9902 WH8102 RCC307 WH7803 MIT9313 MIT9303 CC9311   AS9601 MIT9211 MIT9215 MIT9301 CCMP1986 MIT9312 MIT9515 NATL1A NATL2A                                | 1                                  |
| WH7803 CC9311   AS9601 CCMP1375 CC9605 CC9902 WH8102 MIT9211 MIT9215 RCC307 MIT9301 CCMP1986 MIT9313 MIT9303 MIT9312 MIT9515 NATL1A NATL2A                                | 1                                  |
| RCC307 WH7803 CC9311   AS9601 CCMP1375 CC9605 CC9902 WH8102 MIT9211 MIT9215 MIT9301 CCMP1986 MIT9313 MIT9303 MIT9312 MIT9515 NATL1A NATL2A                                | 1                                  |
| CC9605 WH8102 RCC307 WH7803   AS9601 CCMP1375 CC9902 MIT9211 MIT9215 MIT9301 CCMP1986 MIT9313 MIT9303 MIT9312 MIT9515 NATL1A NATL2A CC9311                                | 1                                  |
| CC9605 CC9902 WH8102 MIT9211 RCC307 WH7803 MIT9313 MIT9303 NATL1A NATL2A CC9311   AS9601 CCMP1375 MIT9215 MIT9301 CCMP1986 MIT9312 MIT9515                                | 1                                  |
| CC9605   AS9601 CCMP1375 CC9902 WH8102 MIT9211 MIT9215 RCC307 WH7803 MIT9301 CCMP1986 MIT9313 MIT9303 MIT9312 MIT9515 NATL1A NATL2A CC9311                                | 1                                  |
| CC9902   AS9601 CCMP1375 CC9605 WH8102 MIT9211 MIT9215 RCC307 WH7803 MIT9301 CCMP1986 MIT9313 MIT9303 MIT9312 MIT9515 NATL1A NATL2A CC9311                                | 1                                  |

\*Genomes are designated by their strain name. The genomes in different parts of bipartitions are separated by "|" symbol

**Supplementary Table 4.** Gene families that do not support high-light adapted Prochlorococcus as a group. Phylogenies of gene families marked with asterisks are shown in Figure 7 and Supplementary Figures 12 and 13.

| <b>Dataset ID</b> | <b>COG Functional Category</b> | <b>Functional Annotation</b>                                        |
|-------------------|--------------------------------|---------------------------------------------------------------------|
| 68.3.12.0         | Not in COGs                    | hypothetical protein                                                |
| *143.2.19.0       | R                              | hydrolase of the metallo-beta-lactamase superfamily                 |
| 188.2.18.0        | S                              | hypothetical protein                                                |
| *62.2.19.0        | J                              | 16S rRNA pseudouridylate synthase                                   |
| 1012.1.17.0       | R                              | Rhomboid family protein                                             |
| *43.4.19.0        | C                              | Aromatic-ring hydroxylase (flavoprotein monooxygenase)              |
| 2.27.8.0          | Q                              | SAM-dependent methyltransferase                                     |
| in1220.1.8.0      | D                              | hypothetical protein                                                |
| 7.6.17.0          | M                              | NAD dependent epimerase/dehydratase                                 |
| 7.9.12.0          | M                              | Nucleotide-diphosphate-sugar epimerase, membrane-associated protein |
| 34.6.10.0         | R                              | Glycerol-3-phosphate oxidase                                        |
| 27.6.6.0          | E                              | imidazoleglycerol-phosphate synthase, cyclase subunit               |
| 11.11.8.0         | R                              | hypothetical protein                                                |
| 17.8.4.0          | P                              | hypothetical protein                                                |
| 9.12.6.0          | I                              | short chain dehydrogenase                                           |
| 11.12.5.0         | M                              | Nucleoside-diphosphate-sugar pyrophosphorylase                      |

**Supplementary Table 5.** Gene families without in-paralogs that support low-light *Prochlorococcus* as a group (i.e., show at least one quartet at  $\geq 80\%$  bootstrap support that conflicts plurality signal). Datasets marked with asterisks are gene families used as examples in Figure 8 and Supplementary Figure 14.

| Dataset ID  | Representative GI number | COG Functional Category | Functional annotation                                                                |
|-------------|--------------------------|-------------------------|--------------------------------------------------------------------------------------|
| 36.5.17.0   | 33860964                 | E                       | O-acetylserine (thiol)-lyase A – cysteine biosynthesis                               |
| 1353.1.8.0  | 123968545                | Not in COGs             | hypothetical protein, probable transmembrane helix <sup>§</sup>                      |
| 705.1.19.0  | 33861828                 | X                       | hypothetical protein, probable membrane protein <sup>§</sup>                         |
| 52.4.11.0   | 33861652                 | H                       | Member of radical SAM superfamily, contains 4Fe-4S cluster, putative Lipoyl synthase |
| *60.1.19.0  | 33861455                 | C                       | Ferredoxin petF, 2Fe-2S iron-sulfur electron carrier in photosynthesis               |
| *746.1.19.0 | 33862008                 | C                       | ATP synthase, delta (OSCP) subunit                                                   |

<sup>§</sup>predicted with SPLIT 4.0 SERVER, <http://split.pmfst.hr/split/4/>

**Supplementary Table 6.** Gene families from Transcription and Translation functional categories (COG categories J and K) that do not support marine *Synechococcus* spp. as a group. In many cases (shown in bold) the conflict is due to two largest *Prochlorococcus* spp. genomes (strains MIT9303 and MIT9313) grouping within marine *Synechococcus* spp. For the datasets marked with an asterisk the support for the latter scenario is poor, but there are highly supported conflicts involving other *Prochlorococcus* genomes. Phylogenies of gene families highlighted in yellow are shown in Supplementary Figures 15 and 16.

| Dataset ID         | COG Functional Category | Functional Annotation                                                             |
|--------------------|-------------------------|-----------------------------------------------------------------------------------|
| <b>72.1.19.0*</b>  | J                       | Methionyl-tRNA formyltransferase                                                  |
| 165.2.19.0         | J                       | Tyrosyl-tRNA synthetase                                                           |
| 820.1.19.0         | J                       | possible 16S rRNA processing protein RimM                                         |
| <b>24.5.19.0</b>   | J                       | Leucyl-tRNA synthetase                                                            |
| <b>764.1.19.0</b>  | J                       | S1 RNA binding domain:Ribonuclease E and G                                        |
| <b>167.2.19.0</b>  | J                       | histidyl-tRNA synthetase                                                          |
| <b>20.3.18.0</b>   | K                       | Type II alternative RNA polymerase sigma factor, sigma-70 family                  |
| <b>38.3.19.0</b>   | J                       | probable tRNA/rRNA methyltransferase                                              |
| 420.1.19.0         | J                       | Alanyl-tRNA synthetase                                                            |
| <b>32.3.19.0</b>   | K                       | probable ribonuclease II                                                          |
| 713.1.19.0         | J                       | tRNA (5-methylaminomethyl-2-thiouridylate)-methyltransferase                      |
| 38.5.19.0          | J                       | tRNA/rRNA methyltransferase (SpoU)                                                |
| 478.1.19.0         | J                       | Glutamyl-tRNA(Gln) amidotransferase subunit C                                     |
| 24.4.19.0          | J                       | Valyl-tRNA synthetase                                                             |
| <b>462.1.19.0</b>  | J                       | Arginyl-tRNA synthetase                                                           |
| 147.2.19.0         | J                       | Lysyl-tRNA synthetase                                                             |
| 940.1.18.0         | J                       | 30S Ribosomal protein S16                                                         |
| <b>525.1.19.0</b>  | J                       | Queuosine biosynthesis protein                                                    |
| <b>833.1.19.0</b>  | K                       | cyanobacteria-specific GntR-like HTH domain containing transcriptional regulator  |
| <b>61.2.19.0*</b>  | J                       | 2-methylthioadenine synthetase                                                    |
| <b>20.4.19.0</b>   | K                       | RNA polymerase sigma factor                                                       |
| <b>85.1.19.0*</b>  | K                       | putative acetyltransferase, GNAT family                                           |
| <b>24.1.19.0</b>   | J                       | Methionyl-tRNA synthetase                                                         |
| 569.1.19.0         | J                       | translation initiation inhibitor, yjgF family                                     |
| <b>735.1.19.0</b>  | J                       | Putative tRNA pseudouridine 55 synthase                                           |
| <b>779.1.19.0*</b> | J                       | tRNA pseudouridine synthase A                                                     |
| <b>111.2.19.0*</b> | J                       | probable GTP-binding protein                                                      |
| <b>81.2.19.0</b>   | J                       | Seryl-tRNA synthetase                                                             |
| 2.2.19.0           | J                       | methyltransferase for Ribosomal protein L11                                       |
| <b>816.1.19.0</b>  | J                       | putative ribonuclease D                                                           |
| <b>187.1.19.0</b>  | K                       | SOS function regulatory protein, LexA repressor                                   |
| <b>778.1.19.0</b>  | J                       | 50S ribosomal protein L13                                                         |
| 437.1.19.0         | J                       | Ribosome-binding factor A                                                         |
| <b>787.1.19.0</b>  | J                       | 30S ribosomal protein S5                                                          |
| <b>697.1.19.0*</b> | J                       | ribonuclease P protein component                                                  |
| <b>704.1.19.0</b>  | J                       | Phenylalanyl-tRNA synthetase alpha chain                                          |
| <b>507.1.19.0*</b> | K                       | Predicted transcriptional regulator, consists of a Zn-ribbon and ATP-cone domains |
| 625.1.19.0         | J                       | putative rRNA (adenine-N6,N6)-dimethyltransferase                                 |

|                    |   |                                                                |
|--------------------|---|----------------------------------------------------------------|
| <b>141.2.19.0</b>  | J | putative methionine aminopeptidase                             |
| <b>191.1.19.0</b>  | J | tRNA-dihydrouridine synthase                                   |
| <b>794.1.19.0*</b> | J | 30S Ribosomal protein S17                                      |
| <b>61.4.17.0</b>   | J | Fe-S oxidoreductase                                            |
| <b>691.1.19.0*</b> | J | Glycyl-tRNA synthetase alpha subunit                           |
| 221.1.19.0         | J | Glutamyl/glutaminyl-tRNA synthetase                            |
| <b>467.1.19.0*</b> | J | 50S ribosomal protein L10                                      |
| 931.1.18.0         | K | GCN5-related N-acetyltransferase                               |
| <b>32.2.19.0</b>   | J | 30S ribosomal protein S1                                       |
| <b>796.1.19.0*</b> | J | 50S ribosomal protein L16                                      |
| <b>191.2.17.0</b>  | J | putative nitrogen regulation protein NifR3 family-like protein |
| 803.1.19.0         | J | 50S ribosomal protein L3                                       |
| 842.1.19.0         | J | 50S ribosomal protein L20                                      |
| 800.1.19.0         | J | 50S ribosomal protein L2                                       |
| <b>783.1.19.0*</b> | J | 30S ribosomal protein S13                                      |
| 854.1.19.0         | J | 30S ribosomal protein S6                                       |
| <b>974.1.17.0*</b> | K | GCN5-related N-acetyltransferase                               |
| 928.1.18.0         | J | 50S ribosomal protein L32                                      |
| <b>150.2.19.0*</b> | J | translation initiation factor IF-1                             |
| 832.1.19.0         | J | Translation Initiation factor 3                                |
| 733.1.19.0         | J | 50S ribosomal protein L21                                      |
| <b>798.1.19.0*</b> | J | 50S ribosomal protein L22                                      |
| 138.2.19.0         | J | protein methyltransferase                                      |
| <b>547.1.19.0*</b> | J | 50S ribosomal protein L19                                      |
| 466.1.19.0         | J | 50S ribosomal protein L7/L12                                   |
| <b>768.1.19.0*</b> | J | 30S ribosomal protein S10                                      |

**Supplementary Table 7.** 35 gene families with at least one homolog in nine sequenced cyanophages. Phylogenies of gene families highlighted in bold are shown in Supplementary Figures 17 and 18.

| <b>Dataset ID</b> | <b>COG Functional Category</b> | <b>Functional annotation</b>                                                    |
|-------------------|--------------------------------|---------------------------------------------------------------------------------|
| 15.2.19.0         | L                              | primosomal protein N'                                                           |
| 253.1.19.0        | X                              | hypothetical protein                                                            |
| 329.1.19.0        | X                              | hypothetical protein                                                            |
| 44.2.19.0         | H                              | Carbon-nitrogen hydrolase:NAD <sup>+</sup> synthase                             |
| 491.1.19.0        | F                              | AICARFT/IMPCHase bienzyme:Methylglyoxal synthase-like domain-containing protein |
| 53.3.19.0         | M                              | Putative NADH-flavin reductase                                                  |
| 6.11.18.0         | L                              | putative ATPase, AAA family                                                     |
| 6.2.19.0          | O                              | FtsH ATP-dependent protease-like protein                                        |
| 6.5.19.0          | L                              | DNA polymerase, gamma and tau subunits                                          |
| 6.8.19.0          | L                              | Holliday junction DNA helicase RuvB                                             |
| 60.1.19.0         | C                              | ferredoxin, petF-like protein                                                   |
| 60.3.14.0         | C                              | ferredoxin                                                                      |
| 610.1.19.0        | F                              | Phosphoribosylformylglycinamide synthetase PurS                                 |
| 624.1.19.0        | L                              | DNA primase                                                                     |
| 682.1.19.0        | L                              | DNA polymerase I                                                                |
| <b>690.1.19.0</b> | C                              | Ferredoxin                                                                      |
| 7.11.19.0         | M                              | NAD dependent epimerase/dehydratase                                             |
| 7.2.19.0          | M                              | Putative nucleotide sugar epimerase                                             |
| 7.6.17.0          | M                              | NAD dependent epimerase/dehydratase                                             |
| 7.7.13.0          | M                              | dTDP-D-glucose 4,6-dehydratase                                                  |
| 7.9.12.0          | M                              | Nucleotide-diphosphate-sugar epimerase, membrane-associated protein             |
| 72.1.19.0         | J                              | putative Methionyl-tRNA formyltransferase                                       |
| 728.1.19.0        | X                              | hypothetical protein                                                            |
| 73.2.19.0         | L                              | RecA bacterial DNA recombination protein                                        |
| 809.1.19.0        | E                              | S-adenosylmethionine decarboxylase proenzyme                                    |
| 816.1.19.0        | J                              | ribonuclease D                                                                  |
| <b>858.1.19.0</b> | F                              | thymidylate synthase                                                            |
| 90.1.19.0         | X                              | phycocyanobilin:ferredoxin oxidoreductase                                       |
| 90.2.18.0         | X                              | 15,16 dihydrobiliverdin:ferredoxin oxidoreductase                               |
| 90.3.18.0         | X                              | phycoerythrobilin:ferredoxin oxidoreductase                                     |
| 913.1.18.0        | L                              | Uracil-DNA glycosylase                                                          |
| 926.1.18.0        | R                              | Predicted pyrophosphatase                                                       |
| in1060.1.8.0      | G                              | possible endolysin                                                              |
| in865.1.13.0      | X                              | CpeT homolog                                                                    |
| in868.1.15.0      | X                              | Predicted dioxygenase                                                           |
